# Supplementary material for: Determinants of infant mortality for children of women prisoners: a longitudinal linked data study
Source: PubMed Central journal article supplement (PMC5984779; doi:10.1186/s12884-018-1840-z), 2018-06-01
Supplement: 12884_2018_1840_MOESM1_ESM.pdf [file 12884_2018_1840_MOESM1_ESM.pdf]

# EXPOSURE TO ALCOHOL, DRUGS AND OTHER TOXINS IN PREGNANCY

| Chapter /<br>Diagnosis level 1                                    | Diagnosis level 2                                    | ICD<br>ed. | ICD codes    |
|-------------------------------------------------------------------|------------------------------------------------------|------------|--------------|
| <b>Endocrine, nutritional and metabolic diseases, etc.</b>        |                                                      |            |              |
| Diseases of other endocrine glands                                | Alcoholic pseudo-Cushing syndrome                    | 9          | 255.0        |
| <b>Mental disorders</b>                                           |                                                      |            |              |
| Organic psychotic conditions                                      | Alcoholic psychoses                                  | 9          | 291          |
| Organic psychotic conditions                                      | Drug psychoses                                       | 9          | 292          |
| Psychoactive substance                                            | Alcohol dependence syndrome                          | 9          | 303          |
| Psychoactive substance                                            | Drug dependence                                      | 9          | 304          |
| Psychoactive substance                                            | Nondependent abuse of drugs                          | 9          | 305          |
| <b>Diseases of the nervous system</b>                             |                                                      |            |              |
| Degenerative diseases of the central nervous system               | Alcoholic nervous system degeneration                | 9          | 331.7        |
| Disorders of the peripheral nervous system                        | Alcoholic polyneuropathy                             | 9          | 357.5        |
| Disorders of the peripheral nervous system                        | Toxic myopathy                                       | 9          | 359.4        |
| <b>Diseases of the circulatory system</b>                         |                                                      |            |              |
| Other forms of heart disease                                      | Alcoholic cardiomyopathy                             | 9          | 425.5        |
| <b>Diseases of the digestive system</b>                           |                                                      |            |              |
| Diseases of esophagus, stomach, and duodenum                      | Alcoholic gastritis                                  | 9          | 535.3        |
| Other diseases of digestive system                                | Alcoholic chronic liver disease                      | 9          | 571.0-571.3  |
| Other diseases of digestive system                                | Alcoholic pancreatitis                               | 9          | 577.1        |
| <b>Complications of pregnancy, childbirth, and the puerperium</b> |                                                      |            |              |
| Complications mainly related to pregnancy                         | Drug dependence complicating pregnancy, etc.         | 9          | 648.3-648.34 |
| Complications mainly related to pregnancy                         | Tobacco use disorder complicating pregnancy, etc.    | 9          | 649          |
| Normal delivery, other indications for care in pregnancy          | Known or suspected fetal abnormality, alcohol        | 9          | 655.43       |
| <b>Certain conditions originating in the perinatal period</b>     |                                                      |            |              |
| Maternal causes of perinatal morbidity and mortality              | Noxious influences affecting fetus or newborn        | 9          | 760.7        |
| Maternal causes of perinatal morbidity and mortality              | Fetal alcohol syndrome                               | 9          | 760.71       |
| Maternal causes of perinatal morbidity and mortality              | Exposure to narcotics, perinatal                     | 9          | 760.72       |
| Maternal causes of perinatal morbidity and mortality              | Other noxious influences affecting fetus/newborn     | 9          | 760.79       |
| Ill-defined conditions originating in the perinatal period        | Drug reactions/intoxications specific to newborn     | 9          | 779.4        |
| Ill-defined conditions originating in the perinatal period        | Drug withdrawal syndrome in newborn                  | 9          | 779.5        |
| <b>Symptoms, signs, and ill-defined conditions</b>                |                                                      |            |              |
| Nonspecific abnormal findings                                     | Excessive blood level of alcohol                     | 9          | 790.3        |
| <b>Injury and poisoning</b>                                       |                                                      |            |              |
| Poisoning by drugs, medicinal and biological substances           | by opium                                             | 9          | 965.0-965.00 |
| Poisoning by drugs, medicinal and biological substances           | by heroin                                            | 9          | 965.01       |
| Poisoning by drugs, medicinal and biological substances           | by methadone                                         | 9          | 965.02       |
| Poisoning by drugs, medicinal and biological substances           | by other opiates and related narcotics               | 9          | 965.09       |
| Poisoning by drugs, medicinal and biological substances           | by barbiturates                                      | 9          | 967.0        |
| Poisoning by drugs, medicinal and biological substances           | by chloral hydrate group                             | 9          | 967.1        |
| Poisoning by drugs, medicinal and biological substances           | by paraldehyde                                       | 9          | 967.2        |
| Poisoning by drugs, medicinal and biological substances           | by bromine compounds                                 | 9          | 967.3        |
| Poisoning by drugs, medicinal and biological substances           | by methaqualone compounds                            | 9          | 967.4        |
| Poisoning by drugs, medicinal and biological substances           | by glutethimide group                                | 9          | 967.5        |
| Poisoning by drugs, medicinal and biological substances           | by mixed sedatives                                   | 9          | 967.6        |
| Poisoning by drugs, medicinal and biological substances           | by other sedatives and hypnotics                     | 9          | 967.8        |
| Poisoning by drugs, medicinal and biological substances           | by unspecified sedative or hypnotic                  | 9          | 967.9        |
| Poisoning by drugs, medicinal and biological substances           | by antidepressants                                   | 9          | 969.0        |
| Poisoning by drugs, medicinal and biological substances           | by phenothiazine-based tranquilizers                 | 9          | 969.1        |
| Poisoning by drugs, medicinal and biological substances           | by butyrophenone-based tranquilizers                 | 9          | 969.2        |
| Poisoning by drugs, medicinal and biological substances           | by antipsychotics, neuroleptics, major tranquilizers | 9          | 969.3        |
| Poisoning by drugs, medicinal and biological substances           | by benzodiazepine-based tranquilizers                | 9          | 969.4        |
| Poisoning by drugs, medicinal and biological substances           | by other tranquilizers                               | 9          | 969.5        |
| Poisoning by drugs, medicinal and biological substances           | by psychodysleptics (hallucinogens)                  | 9          | 969.6        |
| Poisoning by drugs, medicinal and biological substances           | by psychostimulants                                  | 9          | 969.7        |
| Poisoning by drugs, medicinal and biological substances           | by other specified psychotropic agents               | 9          | 969.8        |
| Poisoning by drugs, medicinal and biological substances           | by unspecified psychotropic agents                   | 9          | 969.9        |
| Poisoning by drugs, medicinal and biological substances           | by opiate antagonists                                | 9          | 970.1        |
| Poisoning by drugs, medicinal and biological substances           | by other specified CNS stimulants (inc. cocaine)     | 9          | 970.8        |
| Poisoning by drugs, medicinal and biological substances           | by unspecified CNS stimulants                        | 9          | 970.9        |
| Poisoning by drugs, medicinal and biological substances           | by alcohol deterrents                                | 9          | 977.3        |
| Toxic effects of substances chiefly nonmedicinal                  | Toxic effect of alcohol                              | 9          | 980          |
| Toxic effects of substances chiefly nonmedicinal                  | Toxic effect of petroleum products                   | 9          | 981          |
| Toxic effects of substances chiefly nonmedicinal                  | Toxic effect of other solvents                       | 9          | 982          |
| Toxic effects of substances chiefly nonmedicinal                  | Toxic effect of lead (including fumes)               | 9          | 984          |
| Toxic effects of substances chiefly nonmedicinal                  | Toxic effect of other gases, fumes, or vapors        | 9          | 987          |

**External causes of injury**

|                                                           |                                                     |   |        |
|-----------------------------------------------------------|-----------------------------------------------------|---|--------|
| Accidental poisoning by drugs, medicinal substances, etc. | by heroin                                           | 9 | E850.0 |
| Accidental poisoning by drugs, medicinal substances, etc. | by methadone                                        | 9 | E850.1 |
| Accidental poisoning by drugs, medicinal substances, etc. | by other opiates and related narcotics              | 9 | E850.2 |
| Accidental poisoning by drugs, medicinal substances, etc. | by barbiturates                                     | 9 | E851   |
| Accidental poisoning by drugs, medicinal substances, etc. | by sedatives and hypnotics                          | 9 | E852   |
| Accidental poisoning by drugs, medicinal substances, etc. | by tranquilizers                                    | 9 | E853   |
| Accidental poisoning by drugs, medicinal substances, etc. | by other psychotropic agents                        | 9 | E854   |
| Accidental poisoning by other solid and liquid substances | by alcohol not elsewhere                            | 9 | E860   |
| Accidental poisoning by other solid and liquid substances | by petroleum, other solvents                        | 9 | E862   |
| Accidental poisoning by other solid and liquid substances | by other gases and vapors                           | 9 | E869   |
| Suicide and self-inflicted injury                         | Suicide and self-inflicted poisoning solid, liquid  | 9 | E950   |
| Suicide and self-inflicted injury                         | Suicide and self-inflicted poisoning by dgases      | 9 | E951   |
| Suicide and self-inflicted injury                         | Suicide and self-inflicted poisoning by other gases | 9 | E952   |
| Undetermined Whether Accidentally Or Purposely Inflicted  | by analgesics, antipyretics, and antirheumatics     | 9 | E980.0 |
| Undetermined Whether Accidentally Or Purposely Inflicted  | by barbiturates                                     | 9 | E980.1 |
| Undetermined Whether Accidentally Or Purposely Inflicted  | other sedatives and hypnotics                       | 9 | E980.2 |
| Undetermined Whether Accidentally Or Purposely Inflicted  | by tranquilizers and other psychotropic agents      | 9 | E980.3 |
| Undetermined Whether Accidentally Or Purposely Inflicted  | by other specified drugs and medicinal substances   | 9 | E980.4 |
| Undetermined Whether Accidentally Or Purposely Inflicted  | by unspecified drug or medicinal substance          | 9 | E980.5 |
| Undetermined Whether Accidentally Or Purposely Inflicted  | by other and unspecified solid, liquid substances   | 9 | E980.9 |
| Undetermined Whether Accidentally Or Purposely Inflicted  | Poisoning by gases in domestic use                  | 9 | E981   |
| Undetermined Whether Accidentally Or Purposely Inflicted  | Poisoning by other gases                            | 9 | E982   |

**Supplementary classification of factors**

|                                                           |                                       |   |        |
|-----------------------------------------------------------|---------------------------------------|---|--------|
| Persons with potential health hazards                     | Personal history of alcoholism        | 9 | V11.3  |
| Persons encountering health services, other circumstances | Counseling on substance use and abuse | 9 | V65.42 |
| Special screening for mental disorders                    | Screening for alcoholism              | 9 | V79.1  |

**Endocrine, nutritional and metabolic diseases**

|                                     |                                         |    |       |
|-------------------------------------|-----------------------------------------|----|-------|
| Disorders of other endocrine glands | Drug-induced Cushing syndrome           | 10 | E24.2 |
| Disorders of other endocrine glands | Alcohol-induced pseudo-Cushing syndrome | 10 | E24.4 |

**Mental and behavioural disorders**

|                                   |                                                    |    |     |
|-----------------------------------|----------------------------------------------------|----|-----|
| Due to psychoactive substance use | due to use of alcohol                              | 10 | F10 |
| Due to psychoactive substance use | due to use of opioids                              | 10 | F11 |
| Due to psychoactive substance use | due to use of cannabinoids                         | 10 | F12 |
| Due to psychoactive substance use | due to use of sedatives or hypnotics               | 10 | F13 |
| Due to psychoactive substance use | due to use of cocaine                              | 10 | F14 |
| Due to psychoactive substance use | due to use of other stimulants, including caffeine | 10 | F15 |
| Due to psychoactive substance use | due to use of hallucinogens                        | 10 | F16 |
| Due to psychoactive substance use | due to use of tobacco                              | 10 | F17 |
| Due to psychoactive substance use | due to use of volatile solvents                    | 10 | F18 |
| Due to psychoactive substance use | due to multiple drug use, or other substances      | 10 | F19 |

**Diseases of the nervous system**

|                                                          |                                               |    |       |
|----------------------------------------------------------|-----------------------------------------------|----|-------|
| Other degenerative diseases of the nervous system        | Degeneration of nervous system due to alcohol | 10 | G31.2 |
| Polyneuropathies, disorders of peripheral nervous system | Drug-induced polyneuropathy                   | 10 | G62.0 |
| Polyneuropathies, disorders of peripheral nervous system | Alcoholic polyneuropathy                      | 10 | G62.1 |
| Diseases of myoneural junction and muscle                | Drug-induced myopathy                         | 10 | G72.0 |
| Diseases of myoneural junction and muscle                | Alcoholic myopathy                            | 10 | G72.1 |

**Diseases of the circulatory system**

|                              |                                                 |    |       |
|------------------------------|-------------------------------------------------|----|-------|
| Other forms of heart disease | Alcoholic cardiomyopathy                        | 10 | I42.6 |
| Other forms of heart disease | Cardiomyopathy due to drugs and external agents | 10 | I42.7 |

**Diseases of the digestive system**

|                                                      |                                      |    |       |
|------------------------------------------------------|--------------------------------------|----|-------|
| Diseases of oesophagus, stomach and duodenum         | Alcoholic gastritis                  | 10 | K29.2 |
| Diseases of liver                                    | Alcoholic liver disease              | 10 | K70   |
| Disorders of gallbladder, biliary tract and pancreas | Alcohol-induced chronic pancreatitis | 10 | K86.0 |

**Pregnancy, childbirth and the puerperium**

|                                                       |                                                |    |       |
|-------------------------------------------------------|------------------------------------------------|----|-------|
| Maternal care for known/suspected fetal abnorm/damage | Maternal care for damage to fetus from alcohol | 10 | O35.4 |
| Maternal care for known/suspected fetal abnorm/damage | Maternal care for damage to fetus by drugs     | 10 | O35.5 |

**Certain conditions originating in the perinatal period**

|                                                         |                                                |    |       |
|---------------------------------------------------------|------------------------------------------------|----|-------|
| Fetus/newborn affected noxious via placenta/breast milk | Fetus/newborn affected by maternal use tobacco | 10 | P04.2 |
| Fetus/newborn affected noxious via placenta/breast milk | Fetus/newborn affected by maternal use alcohol | 10 | P04.3 |
| Fetus/newborn affected noxious via placenta/breast milk | Fetus/newborn affected by maternal use drugs   | 10 | P04.4 |

**Congenital malformations, deformations, etc.**

|                                |                                     |    |       |
|--------------------------------|-------------------------------------|----|-------|
| Other congenital malformations | Fetal alcohol syndrome (dysmorphic) | 10 | Q86.0 |
|--------------------------------|-------------------------------------|----|-------|

**Symptoms, signs, etc. not elsewhere classified**

|                                                         |                                                    |    |       |
|---------------------------------------------------------|----------------------------------------------------|----|-------|
| Findings of drugs and substances, not normally in blood | Finding of alcohol in blood                        | 10 | R78.0 |
| Findings of drugs and substances, not normally in blood | Finding of opiate in blood                         | 10 | R78.1 |
| Findings of drugs and substances, not normally in blood | Finding of cocaine in blood                        | 10 | R78.2 |
| Findings of drugs and substances, not normally in blood | Finding of hallucinogen in blood                   | 10 | R78.3 |
| Findings of drugs and substances, not normally in blood | Finding of other drug addictive potential in blood | 10 | R78.4 |
| Findings of drugs and substances, not normally in blood | Finding of psychotropic drug in blood              | 10 | R78.5 |

**Injury, poisoning, other consequences of external causes**

|                                                        |                                                    |    |       |
|--------------------------------------------------------|----------------------------------------------------|----|-------|
| Poisoning by drugs, medicaments, biological substances | by narcotics and psychodysleptics                  | 10 | T40   |
| Poisoning by drugs, medicaments, biological substances | by barbiturates                                    | 10 | T42.3 |
| Poisoning by drugs, medicaments, biological substances | by benzodiazepines                                 | 10 | T42.4 |
| Poisoning by drugs, medicaments, biological substances | by other antiepileptic and sedative-hypnotic drugs | 10 | T42.6 |
| Poisoning by drugs, medicaments, biological substances | by unspecified sedative-hypnotic drugs             | 10 | T42.7 |
| Poisoning by drugs, medicaments, biological substances | Poisoning by psychotropic drugs, other             | 10 | T43   |
| Poisoning by drugs, medicaments, biological substances | by alcohol deterrent                               | 10 | T50.6 |
| Poisoning by drugs, medicaments, biological substances | by opiate antagonist                               | 10 | T50.7 |
| Poisoning by drugs, medicaments, biological substances | Toxic effect of alcohol                            | 10 | T51   |
| Poisoning by drugs, medicaments, biological substances | Toxic effect of organic solvents                   | 10 | T52   |
| Poisoning by drugs, medicaments, biological substances | Toxic effect of aromatic hydrocarbons, etc. [CFCs] | 10 | T53   |
| Poisoning by drugs, medicaments, biological substances | Toxic effect of other gases, fumes and vapours     | 10 | T59   |

**External causes of morbidity and mortality**

|                                            |                                                      |    |     |
|--------------------------------------------|------------------------------------------------------|----|-----|
| Accidental poisoning by noxious substances | by antiepileptic, sedative-hypnotic,psychotropic etc | 10 | X41 |
| Accidental poisoning by noxious substances | by and exposure to narcotics and psychodysleptics    | 10 | X42 |
| Accidental poisoning by noxious substances | by alcohol                                           | 10 | X45 |
| Accidental poisoning by noxious substances | by organic solvents,hydrocarbons and their vapours   | 10 | X46 |
| Accidental poisoning by noxious substances | by other gases and vapours                           | 10 | X47 |
| Intentional self-harm                      | by antiepileptic, sedative-hypnotic,psychotropic etc | 10 | X61 |
| Intentional self-harm                      | by and exposure to narcotics and psychodysleptics    | 10 | X62 |
| Intentional self-harm                      | by alcohol                                           | 10 | X65 |
| Intentional self-harm                      | by organic solvents,hydrocarbons and their vapours   | 10 | X66 |
| Intentional self-harm                      | by other gases and vapours                           | 10 | X67 |
| Event of undetermined intent               | by antiepileptic, sedative-hypnotic,psychotropic etc | 10 | Y11 |
| Event of undetermined intent               | by and exposure to narcotics and psychodysleptics    | 10 | Y12 |
| Event of undetermined intent               | by alcohol                                           | 10 | Y15 |
| Event of undetermined intent               | by organic solvents,hydrocarbons and their vapours   | 10 | Y16 |
| Event of undetermined intent               | by other gases and vapours                           | 10 | Y17 |

|                                                      |                                      |    |     |
|------------------------------------------------------|--------------------------------------|----|-----|
| Supplementary factors related to causes of morbidity | Evidence of alcohol involvement, BAC | 10 | Y90 |
|------------------------------------------------------|--------------------------------------|----|-----|

|                                                      |                                                     |    |     |
|------------------------------------------------------|-----------------------------------------------------|----|-----|
| Supplementary factors related to causes of morbidity | Evidence of alcohol involvement, level intoxication | 10 | Y91 |
|------------------------------------------------------|-----------------------------------------------------|----|-----|

**Factors influencing health status, health service contact**

|                                                           |                                                  |    |       |
|-----------------------------------------------------------|--------------------------------------------------|----|-------|
| Persons encountering health services, specific care       | Alcohol rehabilitation                           | 10 | Z50.2 |
| Persons encountering health services, specific care       | Drug rehabilitation                              | 10 | Z50.3 |
| Persons encountering health services, other circumstances | Alcohol abuse counselling and surveillance       | 10 | Z71.4 |
| Persons encountering health services, other circumstances | Drug abuse counselling and surveillance          | 10 | Z71.5 |
| Problems related to lifestyle                             | Alcohol use                                      | 10 | Z72.1 |
| Problems related to lifestyle                             | Drug use                                         | 10 | Z72.2 |
| Persons with potential health hazards                     | Personal history of psychoactive substance abuse | 10 | Z86.4 |

## INJURY BY EXTERNAL CAUSES

| Chapter / Diagnosis level 1                              | Diagnosis level 2                                                            | ICD ed. | ICD codes |
|----------------------------------------------------------|------------------------------------------------------------------------------|---------|-----------|
| <b>External causes</b> (excl. poisoning & medical comp.) |                                                                              |         |           |
| Accidents                                                | Transport accidents                                                          | 9       | E800-E848 |
|                                                          | Accidents in the home (all entries under 'place of occurrence' = home)       |         | E849.0    |
|                                                          | Accidents (falls, fire, natural factors, drowning, other)                    |         | E880-E929 |
| Accidents                                                | Transport accidents                                                          | 10      | V01-V99   |
|                                                          |                                                                              |         | Y85       |
|                                                          | Accidents (falls, mechanical forces, fire, natural factors, drowning, other) |         | W00-X39   |
|                                                          |                                                                              |         | X50-X59   |
|                                                          |                                                                              |         | Y86       |
| Undetermined intent                                      | Injury undetermined if accidental or purposely inflicted (excl. poisoning)   | 9       | E983-E989 |
| Undetermined intent                                      | Injury undetermined if accidental or purposely inflicted (excl. poisoning)   | 10      | Y20-Y34   |
|                                                          |                                                                              |         | Y87.2     |
| Legal intervention                                       | Injury due to legal intervention (e.g. manhandling)                          | 9       | E970-E977 |
| Legal intervention                                       | Injury due to legal intervention (e.g. manhandling)                          | 10      | Y35       |
|                                                          |                                                                              |         | Y89       |
| <b>Assault</b> (excl. poisoning)                         |                                                                              |         |           |
| Assault                                                  | Injury purposely inflicted by other persons (excl. by poisoning)             | 9       | E960-E961 |
|                                                          |                                                                              |         | E963-E969 |
| Assault                                                  | Assault (excl. by poisoning)                                                 | 10      | X91-Y09   |
|                                                          |                                                                              |         | Y87.1     |

## INFECTION RELATED HOSPITALISATION

| Chapter / Diagnosis level 1                                 | Diagnosis level 2                                                    | ICD ed. | ICD codes |
|-------------------------------------------------------------|----------------------------------------------------------------------|---------|-----------|
| <b>Infections (any)</b>                                     |                                                                      |         |           |
| Infectious and parasitic diseases                           | Any hospitalisation                                                  | 9       | 001-139   |
| Infectious and parasitic diseases                           | Any hospitalisation                                                  | 10      | A00-B99   |
| Respiratory system                                          | Acute respiratory infections                                         | 9       | 460-466   |
| Respiratory system                                          | Acute respiratory infections                                         | 10      | J00-J06   |
| Respiratory system                                          | Pneumonia and influenza                                              | 9       | 480-488   |
| Respiratory system                                          | Pneumonia and influenza                                              | 10      | J09-J18   |
| Factors influencing health service contact                  | Contact with and exposure to communicable diseases                   | 9       | V01       |
| Factors influencing health service contact                  | Contact with and exposure to communicable diseases                   | 10      | Z20       |
| Factors influencing health service contact                  | Carrier of infectious disease                                        | 9       | V02       |
| Factors influencing health service contact                  | Carrier of infectious disease                                        | 10      | Z22       |
| Factors influencing health service contact                  | Asymptomatic HIV status                                              | 9       | V08       |
| Factors influencing health service contact                  | Asymptomatic HIV status                                              | 10      | Z21       |
| <b>Infections in pregnancy</b>                              |                                                                      |         |           |
| Complications related to pregnancy                          | Infections of the genitourinary tract in pregnancy                   | 9       | 646.6     |
| Complications related to pregnancy                          | Infections of the genitourinary tract in pregnancy                   | 10      | O23       |
| Complications related to pregnancy                          | Infective and parasitic conditions in the mother                     | 9       | 647       |
| Complications related to pregnancy                          | Infective and parasitic conditions in the mother                     | 10      | O98       |
| Complications related to pregnancy                          | Suspected fetal damage from maternal viral disease                   | 10      | O35.3     |
| Certain conditions originating in the perinatal period      | Fetus/newborn affected by maternal infectious and parasitic diseases | 9       | 760.2     |
| Certain conditions originating in the perinatal period      | Fetus/newborn affected by maternal infectious and parasitic diseases | 10      | P00.2     |
| Certain conditions originating in the perinatal period      | Infections specific to the perinatal period                          | 9       | 771       |
| Certain conditions originating in the perinatal period      | Infections specific to the perinatal period                          | 10      | P35-P39   |
| <b>Chronic and sexually transmitted infections</b>          |                                                                      |         |           |
| Tuberculosis                                                | Tuberculosis                                                         | 9       | 010-018   |
| Tuberculosis                                                | Tuberculosis                                                         | 10      | A15-A19   |
| HIV                                                         | HIV                                                                  | 9       | 042-044   |
| HIV                                                         | HIV                                                                  | 10      | B20-B24   |
| Infections with a predominantly sexual mode of transmission | Syphilis and other venereal diseases                                 | 9       | 090-099   |
| Infections with a predominantly sexual mode of transmission | Infections with a predominantly sexual mode of transmission          | 10      | A50-A64   |
| Herpes simplex                                              | Herpes simplex                                                       | 9       | 054       |
| Herpes simplex                                              | Herpes simplex                                                       | 10      | B00       |
| Viral hepatitis                                             | Viral hepatitis                                                      | 9       | 070       |
| Viral hepatitis                                             | Viral hepatitis                                                      | 10      | B15-B19   |
| Complications related to pregnancy                          | Infective/parasitic conditions in mother – Syphilis                  | 9       | 647.0     |
| Complications related to pregnancy                          | Infective/parasitic conditions in mother – Gonorrhoea                | 9       | 647.1     |
| Complications related to pregnancy                          | Infective/parasitic conditions in mother – Other venereal            | 9       | 647.2     |
| Complications related to pregnancy                          | Infective/parasitic conditions in mother – Tuberculosis              | 9       | 647.3     |
| Complications related to pregnancy                          | Infective/parasitic conditions in mother – Tuberculosis              | 10      | O98.0     |
| Complications related to pregnancy                          | Infective/parasitic conditions in mother – Syphilis                  | 10      | O98.1     |
| Complications related to pregnancy                          | Infective/parasitic conditions in mother – Gonorrhoea                | 10      | O98.2     |
| Complications related to pregnancy                          | Infective/parasitic conditions in mother – Other sexually trans.     | 10      | O98.3     |
| Complications related to pregnancy                          | Infective/parasitic conditions in mother – Viral hepatitis           | 10      | O98.4     |
| Complications related to pregnancy                          | Infective/parasitic conditions in mother – HIV                       | 10      | O98.7     |
| Factors influencing health service contact                  | Asymptomatic HIV status                                              | 9       | V08       |
| Factors influencing health service contact                  | Asymptomatic HIV status                                              | 10      | Z21       |
| Factors influencing health service contact                  | Contact with or exposure to venereal diseases                        | 9       | V01.6     |
| Factors influencing health service contact                  | Contact with or exposure to infections with sexual mode transmission | 10      | Z20.2     |
| Factors influencing health service contact                  | Contact with or exposure to viral hepatitis                          | 10      | Z20.5     |
| Factors influencing health service contact                  | Contact with or exposure to HIV                                      | 10      | Z20.6     |
| Factors influencing health service contact                  | Carrier of gonorrhoea                                                | 9       | V02.7     |
| Factors influencing health service contact                  | Carrier of other venereal diseases                                   | 9       | V02.8     |
| Factors influencing health service contact                  | Carrier of infections predominantly sexual mode                      | 10      | Z22.4     |
| Factors influencing health service contact                  | Carrier of viral hepatitis                                           | 9       | V02.6     |
| Factors influencing health service contact                  | Carrier of viral hepatitis                                           | 10      | Z22.5     |

## MATERNAL MENTAL ILLNESS

| Chapter / Diagnosis level 1                | Diagnosis level 2                                                                                                            | ICD  | ICD codes                       |
|--------------------------------------------|------------------------------------------------------------------------------------------------------------------------------|------|---------------------------------|
| <b>Mental Health Service Presentation</b>  |                                                                                                                              |      |                                 |
| Mental Health Service Presentation         | Any MHIS contact (excl. substance-use related)<br><b>**exclude codes for alcohol or substances with abuse potential**</b>    | 9-10 | Any<br><b>exc. Drug/Alc</b>     |
| <b>Hospitalisation</b>                     |                                                                                                                              |      |                                 |
| Mental and behavioural disorders           | Any hospitalisation (excl. substance-use related)<br><b>**exclude codes for alcohol or substances with abuse potential**</b> | 9    | 290-319<br><b>exc. Drug/Alc</b> |
| Mental and behavioural disorders           | Any hospitalisation (excl. substance-use related)<br><b>**exclude codes for alcohol or substances with abuse potential**</b> | 10   | F00-F99<br><b>exc. Drug/Alc</b> |
| Factors influencing health service contact | Personal history of a mental disorder                                                                                        | 9    | V11                             |
| Factors influencing health service contact | Mental and behavioural problems                                                                                              | 9    | V40                             |
| Factors influencing health service contact | Screening for mental disorders                                                                                               | 9    | V79                             |
| Factors influencing health service contact | General psychiatric examination                                                                                              | 10   | Z00.4<br>Z04.6                  |
| Factors influencing health service contact | Observation for suspected mental disorder                                                                                    | 10   | Z03.2                           |
| Complications mainly relating to pregnancy | Mental disorders complicating pregnancy, etc.                                                                                | 9    | 648.4                           |
| Complications mainly relating to pregnancy | Mental disorders complicating pregnancy, etc.                                                                                | 10   | O99.3                           |
| <b>Self-harm (excl. poisoning)</b>         |                                                                                                                              |      |                                 |
| Self-inflicted injury                      | Suicide and self-inflicted injury (excl. by poisoning)                                                                       | 9    | E953-E959                       |
| Self-inflicted injury                      | Suicide and self-inflicted injury (excl. by poisoning)                                                                       | 10   | X70-X84<br>Y87.0                |

## PREGNANCY COMPLICATIONS

| Chapter / Diagnosis level 1                                           | Diagnosis level 2                                             | ICD ed. | ICD codes   |
|-----------------------------------------------------------------------|---------------------------------------------------------------|---------|-------------|
| <b>Abruptio placentae &amp; other placental disorders</b>             |                                                               |         |             |
| Complications mainly related to pregnancy                             | Abruptio placentae                                            | 9       | 641.2       |
| Complications mainly related to pregnancy                             | Other placental conditions affecting management of the mother | 9       | 656.7       |
| Maternal care related fetus, amniotic cavity, possible delivery probs | Abruptio placentae                                            | 10      | O45         |
| Maternal care related fetus, amniotic cavity, possible delivery probs | Placental disorders                                           | 10      | O43         |
| <b>Placenta previa</b>                                                |                                                               |         |             |
| Complications mainly related to pregnancy                             | Placenta previa                                               | 9       | 641.0-641.1 |
| Maternal care related fetus, amniotic cavity, possible delivery probs | Placenta previa                                               | 10      | O44         |
| <b>Premature Rupture of Membranes</b>                                 |                                                               |         |             |
| Other indications for care in pregnancy, labor, and delivery          | Premature rupture of membranes                                | 9       | 658.1       |
| Maternal care related fetus, amniotic cavity, possible delivery probs | Premature rupture of membranes                                | 10      | O42         |

## MULTIPLE GESTATION

| Chapter                           | Diagnosis level 1                   | Diagnosis 2                         | ICD ed. | ICD codes |
|-----------------------------------|-------------------------------------|-------------------------------------|---------|-----------|
| Complications of pregnancy, etc.  | Normal delivery, etc.               | Multiple gestation                  | 9       | 651       |
| Supplementary classification      | Live-born infants according to type | Twin birth mates liveborn           | 9       | V31       |
| Supplementary classification      | Live-born infants according to type | Other multiples                     | 9       | V32-V37   |
| Pregnancy, childbirth, puerperium | Maternal care related to the fetus  | Multiple gestation                  | 10      | O30       |
| Pregnancy, childbirth, puerperium | Maternal care related to the fetus  | Complications to multiple gestation | 10      | O31       |
| Pregnancy, childbirth, puerperium | Delivery                            | Multiple delivery                   | 10      | O84       |



## CHROMOSOMAL ABNORMALITIES

| Chapter                                            | Diagnosis level 1                                          | ICD ed. | ICD codes |
|----------------------------------------------------|------------------------------------------------------------|---------|-----------|
| Complications of pregnancy, childbirth, puerperium | Chromosomal anomalies                                      | 9       | 655.1     |
| Congenital anomalies                               | Chromosomal anomalies                                      | 9       | 758       |
| Pregnancy, childbirth and the puerperium           | Maternal care for (suspected) chromosomal abnorm. in fetus | 10      | O35.1     |
| Congenital malform., deform. and chromosomal ab.   | Chromosomal abnormalities                                  | 10      | Q90-Q99   |

**NON-SIGNIFICANT FACTORS**  
(Tested alone and in combination)

| Chapter / Diagnosis level 1               | Diagnosis level 2                                                 | ICD ed.                                                                  | ICD codes              |
|-------------------------------------------|-------------------------------------------------------------------|--------------------------------------------------------------------------|------------------------|
| <b>Cancer</b>                             |                                                                   |                                                                          |                        |
|                                           | Neoplasms                                                         | Malignant neoplasms                                                      | 9 140-208              |
|                                           | Neoplasms                                                         | Malignant neoplasms                                                      | 10 C00-C97             |
|                                           | Neoplasms                                                         | Neoplasms of uncertain or unspecified nature                             | 9 235-239              |
|                                           | Neoplasms                                                         | Neoplasms of uncertain or unspecified nature                             | 10 D37-D48             |
| <b>Anaemia</b>                            |                                                                   |                                                                          |                        |
|                                           | Diseases of the blood and blood-forming organs                    | Anemia                                                                   | 9 280-285              |
|                                           | Diseases of the blood and blood-forming organs                    | Anemia                                                                   | 10 D50-D64             |
|                                           | Complications mainly related to pregnancy                         | Anemia complicating pregnancy                                            | 9 648.2                |
|                                           | Complications mainly related to pregnancy                         | Anemia complicating pregnancy                                            | 10 O99.0               |
| <b>Nutritional deficiencies</b>           |                                                                   |                                                                          |                        |
|                                           | Endocrine, nutritional and metabolic diseases                     | Nutritional deficiencies                                                 | 9 260-269              |
|                                           | Endocrine, nutritional and metabolic diseases                     | Nutritional deficiencies                                                 | 10 E50-E64             |
| <b>Malnutrition</b>                       |                                                                   |                                                                          |                        |
|                                           | Endocrine, nutritional and metabolic diseases                     | Malnutrition                                                             | 10 E40-E46             |
|                                           | Maternal disorders related to pregnancy                           | Malnutrition in pregnancy                                                | 10 O25                 |
|                                           | Complications predominantly related to pregnancy                  | Maternal care for low weight gain in pregnancy                           | 10 O26.1               |
| <b>Obesity</b>                            |                                                                   |                                                                          |                        |
|                                           | Endocrine, nutritional and metabolic diseases                     | Obesity                                                                  | 9 278.0-278.1          |
|                                           | Endocrine, nutritional and metabolic diseases                     | Obesity                                                                  | 10 E65-E66             |
|                                           | Complications predominantly related to pregnancy                  | Maternal care for excessive weight gain in pregnancy                     | 10 O26.0               |
| <b>Diabetes mellitus</b>                  |                                                                   |                                                                          |                        |
|                                           | Endocrine, nutritional and metabolic diseases                     | Diabetes mellitus                                                        | 9 250                  |
|                                           | Endocrine, nutritional and metabolic diseases                     | Diabetes mellitus                                                        | 10 E10-E14             |
|                                           | Complications mainly related to pregnancy                         | Diabetes mellitus in pregnancy                                           | 9 648.0                |
|                                           | Complications mainly related to pregnancy                         | Diabetes mellitus in pregnancy                                           | 10 O24                 |
|                                           | Complications mainly related to pregnancy                         | Abnormal glucose tolerance complicating pregnancy                        | 9 648.8                |
|                                           | Certain conditions originating in the perinatal period            | Syndrome of 'infant of a diabetic mother'                                | 9 755.0                |
| <b>Abortion (miscarriage and induced)</b> |                                                                   |                                                                          |                        |
|                                           | Complications of pregnancy                                        | Ectopic and molar pregnancy                                              | 9 630-633              |
|                                           | Complications of pregnancy                                        | Other pregnancy with abortive outcome                                    | 9 634-639              |
|                                           | Complications of pregnancy                                        | Pregnancy with abortive outcome                                          | 10 O00-O08             |
|                                           | Complications of pregnancy                                        | Pregnancy care of habitual aborter                                       | 10 O26.2               |
| <b>Hypertension</b>                       |                                                                   |                                                                          |                        |
|                                           | Complications mainly related to pregnancy                         | Hypertension complicating pregnancy, childbirth and the puerperium       | 9 642.0<br>642.2-642.3 |
|                                           | Hypertensive disorders in pregnancy                               | Pre-existing hypertension complicating pregnancy, childbirth, puerperium | 10 O10                 |
|                                           | Hypertensive disorders in pregnancy                               | Gestational hypertension                                                 | 10 O13                 |
|                                           | Hypertensive disorders in pregnancy                               | Unspecified maternal hypertension                                        | 10 O16                 |
| <b>Preeclampsia</b>                       |                                                                   |                                                                          |                        |
|                                           | Complications mainly related to pregnancy                         | Preeclampsia                                                             | 9 642.4-642.5          |
|                                           | Complications mainly related to pregnancy                         | Preeclampsia or eclampsia superimposed on chronic hypertension           | 9 642.7                |
|                                           | Hypertensive disorders in pregnancy                               | Preeclampsia superimposed on chronic hypertension                        | 10 O11                 |
|                                           | Hypertensive disorders in pregnancy                               | Preeclampsia                                                             | 10 O14                 |
| <b>Eclampsia</b>                          |                                                                   |                                                                          |                        |
|                                           | Complications mainly related to pregnancy                         | Eclampsia                                                                | 9 642.6                |
|                                           | Hypertensive disorders in pregnancy                               | Eclampsia                                                                | 10 O15                 |
| <b>Renal disease</b>                      |                                                                   |                                                                          |                        |
|                                           | Genitourinary system                                              | Renal failure                                                            | 9 584-586              |
|                                           | Genitourinary system                                              | Renal failure                                                            | 10 N17-N19             |
|                                           | Factors influencing health service contact                        | Encounter for dialysis and dialysis catheter care                        | 9 V56                  |
|                                           | Complications mainly related to pregnancy                         | Hypertension secondary to renal disease complicating pregnancy           | 9 642.1                |
|                                           | Complications mainly related to pregnancy                         | Unspecified renal disease in pregnancy without mention of hypertension   | 9 646.2                |
|                                           | Factors influencing health service contact                        | Care involving dialysis                                                  | 10 Z49                 |
|                                           | Maternal care other conditions predominantly related to pregnancy | Pregnancy related renal disease                                          | 10 O26.83              |
