# Supplementary material for: Determinants of infant mortality for children of women prisoners: a longitudinal linked data study
Source: PubMed Central journal article supplement (PMC5984779; doi:10.1186/s12884-018-1840-z), 2018-06-01
Supplement: 12884_2018_1840_MOESM2_ESM.pdf [file 12884_2018_1840_MOESM2_ESM.pdf]

## Group 1 Demographic factors

### Regression model of infant mortality, Indigenous children

|                                  | RR   | [95% CI]  | <i>p</i> -value |
|----------------------------------|------|-----------|-----------------|
| Birth year                       | 0.97 | 0.95 0.98 | <.001           |
| Sex                              |      |           |                 |
| Male                             | 1.22 | 1.01 1.47 | .040            |
| Female*                          |      |           |                 |
| Maternal Indigenous status       |      |           |                 |
| Indigenous                       | 1.75 | 0.96 3.19 | .066            |
| Non-Indigenous*                  |      |           |                 |
| Socioeconomic status             |      |           |                 |
| Very low (<5%)                   | 2.06 | 1.31 3.25 | .002            |
| Low (6-25%)                      | 1.93 | 1.24 2.99 | .003            |
| Medium (26-50%)                  | 1.79 | 1.12 2.85 | .015            |
| High (51-100%)*                  |      |           |                 |
| Geographical remoteness          |      |           |                 |
| Major cities and inner regional* |      |           |                 |
| Outer regional                   | 1.10 | 0.84 1.45 | .496            |
| Remote                           | 0.96 | 0.73 1.27 | .793            |
| Very remote                      | 1.07 | 0.84 1.37 | .578            |

\* Reference category

Variables excluded from final multivariate model on basis of significance ( $p > .05$ )

# Includes all other placental disorders except placenta previa.

**Group 2** Baseline pregnancy risk factors

Regression model of infant mortality, Indigenous children

|                    |                      | RR   | [95% | CI]  | p-value |
|--------------------|----------------------|------|------|------|---------|
| Multiple gestation | Yes                  | 2.36 | 1.57 | 3.57 | <.001   |
|                    | No*                  |      |      |      |         |
| Birth spacing      | <18months            | 1.62 | 1.26 | 2.08 | <.001   |
|                    | Firstborn/18months+* |      |      |      |         |
| Parity             | Nulliparous          | 0.92 | 0.73 | 1.16 | .486    |
|                    | Parity 1-2           |      |      |      |         |
|                    | Parity 3+            | 1.22 | 0.97 | 1.53 | .091    |

\* Reference category

Variables excluded from final multivariate model on basis of significance ( $p > .05$ )

Note. Maternal age was excluded prior to multivariate analysis as highly correlated with parity, which was more significant in univariate analysis

### Group 3 Pregnancy complications

#### Regression model of infant mortality, Indigenous children

|                                                     |     | RR   | [95% | CI]  | p-value |
|-----------------------------------------------------|-----|------|------|------|---------|
| Abruptio placentae and other disorders <sup>#</sup> | Yes | 3.73 | 1.89 | 7.34 | <.001   |
|                                                     | No* |      |      |      |         |
| Placenta previa                                     | Yes | 2.10 | 0.69 | 6.42 | .193    |
|                                                     | No* |      |      |      |         |
| Premature rupture of membranes                      | Yes | 1.72 | 1.21 | 2.42 | .002    |
|                                                     | No* |      |      |      |         |
| Infection related hospitalisation in pregnancy      | Yes | 0.99 | 0.70 | 1.40 | .937    |
|                                                     | No* |      |      |      |         |

\* Reference category

Variables excluded from final multivariate model on basis of significance ( $p > .05$ )

<sup>#</sup> Includes all other placental disorders except placenta previa

**Group 4** Other maternal factors/exposures in pregnancy

Regression model of infant mortality, Indigenous children

|                                                            | RR   | [95% | CI]  | <i>p</i> -value |
|------------------------------------------------------------|------|------|------|-----------------|
| Substance use related service contact in pregnancy         |      |      |      |                 |
| Yes                                                        | 1.99 | 1.17 | 3.36 | .011            |
| No*                                                        |      |      |      |                 |
| Hospitalisation for external causes of injury in pregnancy |      |      |      |                 |
| Yes                                                        | 1.43 | 1.02 | 1.99 | .038            |
| No*                                                        |      |      |      |                 |
| Mental health related service contact in pregnancy         |      |      |      |                 |
| Yes                                                        | 0.70 | 0.39 | 1.27 | .243            |
| No*                                                        |      |      |      |                 |
| Sibling in contact with Child Protection in pregnancy      |      |      |      |                 |
| Yes                                                        | 1.97 | 1.36 | 2.86 | <.001           |
| No*                                                        |      |      |      |                 |

\* Reference category

Variables excluded from final multivariate model on basis of significance ( $p > .05$ )
